# Supplementary material for: STM2457 Inhibits the Invasion and Metastasis of Pancreatic Cancer by Down-Regulating BRAF-Activated Noncoding RNA N6-Methyladenosine Modification
Source: MDPI journal article supplement (doi:10.3390/cimb45110555), 2023-11-03
Supplement: s1 [file s1]

**Table S1. The primer sequence table**

| Gene name |           | 5'-3'Sequence         |
|-----------|-----------|-----------------------|
| GAPDH     | Sense     | TCAAGAAGGTGGTGAAGCAGG |
|           | Antisense | TCAAAGGTGGAGGAGTGGGT  |
| BANCR     | Sense     | GAGCCTTGCCAGTCCATT    |
|           | Antisense | TGCAGAGGTGAGATTCAGGT  |
